# Supplementary material
Source: HighWire-hosted journal article supplement (http://thorax.bmjjournals.com/highwire/filestream/174372/field_highwire_adjunct_files/0/594295_Appendix.pdf)
Supplement: 594295_Appendix.pdf [file 594295_Appendix.pdf]

## Appendix

Association of adult asthma and lung function with maternal smoking in childhood in men and women according to smoking status

|                                 | Never smokers            |                          | Ex-smokers               |                          | Current smokers          |                          |
|---------------------------------|--------------------------|--------------------------|--------------------------|--------------------------|--------------------------|--------------------------|
|                                 | Paternal smoking         | Maternal smoking         | Paternal smoking         | Maternal smoking         | Paternal smoking         | Maternal smoking         |
|                                 | OR (95% CI)*             |
| <i>Men</i>                      |                          |                          |                          |                          |                          |                          |
| Wheeze                          | 1.21 (0.96 to 1.50)      | 0.87 (0.68 to 1.10)      | 0.97 (0.72 to 1.29)      | 1.24 (0.92 to 1.68)      | 1.19 (0.98 to 1.44)      | 1.24 (1.02 to 1.50)      |
| >3 asthma symptoms              | 1.13 (0.87 to 1.47)      | 0.72 (0.53 to 0.97)      | 1.07 (0.77 to 1.50)      | 1.12 (0.79 to 1.58)      | 1.38 (1.09 to 1.75)      | 1.37 (1.10 to 1.71)      |
| Asthma                          | 1.08 (0.76 to 1.54)      | 0.81 (0.54 to 1.23)      | (small numbers)          | (small numbers)          | 0.69 (0.43 to 1.13)      | 1.63 (1.00 to 2.64)      |
| Chronic bronchitis              | 1.00 (0.70 to 1.42)      | 1.07 (0.73 to 1.56)      | 1.14 (0.71 to 1.85)      | 0.99 (0.61 to 1.60)      | 1.35 (1.06 to 1.70)      | 1.25 (0.98 to 1.55)      |
|                                 | <b>β coeff (95% CI)†</b> |
| FEV <sub>1</sub> (ml)           | 3 (-38 to 43)            | -2 (-49 to 44)           | -17 (-80 to 45)          | 24 (-44 to 91)           | -45 (-91 to 2)           | -79 (-127 to -31)        |
| FVC (ml)                        | 15 (-32-62)              | -10 (-64 to 44)          | 6 (-64 to 76)            | 43 (-33 to 119)          | -20 (-74 to 34)          | -27 (-83 to 28)          |
| FEV <sub>1</sub> /FVC ratio (%) | -0.2 (-0.7 to 0.3)       | 0.1 (-0.4 to 0.7)        | -0.3 (-1.0 to 0.4)       | -0.3 (-1.1 to 0.4)       | -0.4 (-1.0 to 0.1)       | -1.1 (-1.7 to -0.5)      |
| BHR (ECRHS slope)               | -0.07 (-0.23 to 0.09)    | 0.19 (0.01 to 0.38)      | 0.03 (-0.20 to 0.27)     | 0.21 (-0.05 to 0.47)     | 0.01 (-0.17 to 0.18)     | -0.14 (-0.32 to 0.00)    |
| <i>Women</i>                    |                          |                          |                          |                          |                          |                          |

|                                 | Never smokers            |                          | Ex-smokers               |                          | Current smokers          |                          |
|---------------------------------|--------------------------|--------------------------|--------------------------|--------------------------|--------------------------|--------------------------|
|                                 | Paternal smoking         | Maternal smoking         | Paternal smoking         | Maternal smoking         | Paternal smoking         | Maternal smoking         |
|                                 | OR (95% CI)*             |
|                                 | OR (95% CI)*             |
| Wheeze                          | 0.93 (0.76 to 1.13)      | 1.21 (0.98 to 1.51)      | 0.72 (0.53 to 0.97)      | 1.35 (0.98 to 1.85)      | 1.06 (0.87 to 1.30)      | 1.06 (0.88 to 1.29)      |
| >3 asthma symptoms              | 0.89 (0.72 to 1.10)      | 1.20 (0.95 to 1.52)      | 0.86 (0.61 to 1.21)      | 1.27 (0.90 to 1.78)      | 1.19 (0.94 to 1.50)      | 1.12 (0.90 to 1.39)      |
| Asthma                          | 0.67 (0.49 to 0.91)      | 1.10 (0.78 to 1.55)      | 0.88 (0.53 to 1.48)      | 1.17 (0.70 to 1.94)      | 1.22 (0.75 to 1.97)      | 1.10 (0.73 to 1.66)      |
| Regular cough and phlegm        | 0.94 (0.70 to 1.25)      | 1.13 (0.82 to 1.56)      | 1.08 (0.65 to 1.80)      | 2.23 (1.38 to 3.60)      | 1.09 (0.82 to 1.44)      | 1.13 (0.90 to 1.46)      |
|                                 | <b>β coeff (95% CI)†</b> |
| FEV <sub>1</sub> (ml)           | 16 (−12 to 44)           | −25 (−58 to 8)           | 9 (−33 to 51)            | 3 (−40 to 46)            | −20 (−58 to 17)          | −53 (−90 to −17)         |
| FVC (ml)                        | 5 (−27 to 38)            | 4 (−34 to 41)            | 29 (−20 to 77)           | 33 (−17 to 83)           | −12 (−55 to 31)          | −42 (−84 to 0)           |
| FEV <sub>1</sub> /FVC ratio (%) | 0.2 (−0.2 to 0.6)        | −0.8 (−1.3 to −0.3)      | −0.3 (−0.1 to 0.3)       | −0.7 (−1.4 to −0.1)      | −0.3 (−0.1 to 0.3)       | −0.5 (−1.0 to 0.1)       |
| BHR (ECRHS slope)               | 0.18 (0.01 to 0.35)      | 0.11 (−0.08 to 0.31)     | 0.00 (−0.27 to 0.26)     | 0.10 (−0.16 to 0.37)     | −0.19 (−0.41 to 0.03)    | −0.22 (−0.43 to 0.00)    |

\*Odds ratios with 95% confidence intervals as estimated by logistic regression adjusting for age, body mass index, number of siblings, current environmental tobacco smoking, current occupation, and study centre.

†Analysed with adjustment for height, age, weight, weight squared, number of siblings, current environmental tobacco smoking, current occupation, and study centre.
